# Supplementary material for: A green synthesis route for the phase and size tunability of copper antimony sulfide nanocrystals with high yield
Source: Royal Society of Chemistry journal article supplement (doi:10.1039/c5nr09097k), 2016-01-01
Supplement: c5nr09097k1.pdf [file c5nr09097k1.pdf]

## Supporting Information

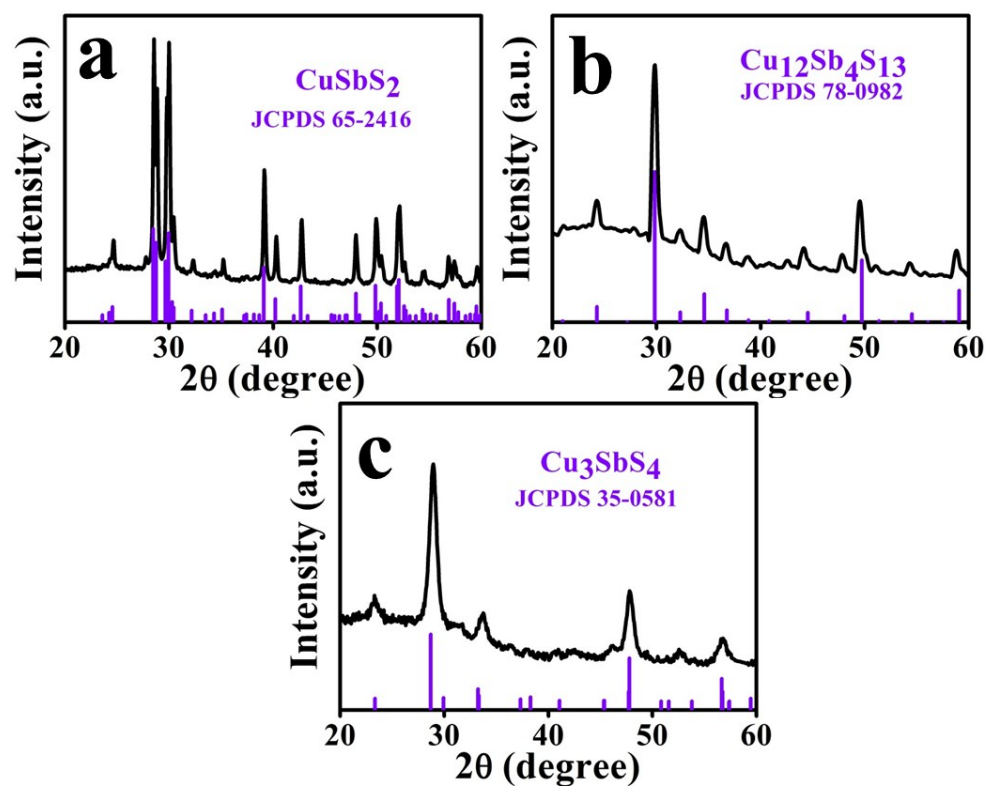

**Figure S1.** XRD patterns of CAS NCs of different phases prepared at 110 °C with heat treatment at 200 °C for 1 h.

| <b>S:Sb<br/>(precursors)</b> | <b>Cu (at.%)</b> | <b>Sb (at.%)</b> | <b>S (at.%)</b> | <b>S:(Cu+Sb)<br/>(products)</b> |
|------------------------------|------------------|------------------|-----------------|---------------------------------|
| <b>2:1</b>                   | <b>25.14</b>     | <b>24.52</b>     | <b>50.34</b>    | <b>1.01</b>                     |
| <b>2.5:1</b>                 | <b>24.91</b>     | <b>24.47</b>     | <b>50.62</b>    | <b>1.03</b>                     |
| <b>3:1</b>                   | <b>24.58</b>     | <b>24.25</b>     | <b>51.17</b>    | <b>1.05</b>                     |
| <b>3.5:1</b>                 | <b>24.33</b>     | <b>24.16</b>     | <b>51.51</b>    | <b>1.06</b>                     |
| <b>4:1</b>                   | <b>24.29</b>     | <b>24.11</b>     | <b>51.60</b>    | <b>1.07</b>                     |

**Table S1.** EDX data of the products prepared at the standard reaction conditions for  $\text{CuSbS}_2$  but with variety precursors ratio of S:Sb. The results indicate that these samples should be  $\text{CuSbS}_2$ .

**Note:** Precursors ratio of Cu:Sb is set as 1:1.

| S:Sb<br>(precursors) | Cu (at.%) | Sb (at.%) | S (at.%) | S:Sb<br>(products) |
|----------------------|-----------|-----------|----------|--------------------|
| 2.5:1                | 41.62     | 14.17     | 44.21    | 12.48:4            |
| 3:1                  | 41.61     | 13.80     | 44.59    | 12.92:4            |
| 4:1                  | 41.82     | 13.44     | 44.74    | 13.32:4            |
| 5:1                  | 41.61     | 13.38     | 45.01    | 13.46:4            |
| 6:1                  | 41.02     | 13.32     | 45.66    | 13.71:4            |
| 7:1                  | 37.73     | 12.60     | 49.67    | 15.77:4            |
| 8:1                  | 36.77     | 12.58     | 50.65    | 16.10:4            |

**Table S2.** EDX data of products prepared at the standard reaction conditions for  $\text{Cu}_{12}\text{Sb}_4\text{S}_{13}$  but with variety precursors ratio of S:Sb. The results indicate that the phase transformation has taken place when the precursors ratio of S:Sb reaches to 7:1.

**Note:** Precursors ratio of Cu:Sb is set as 3:1.

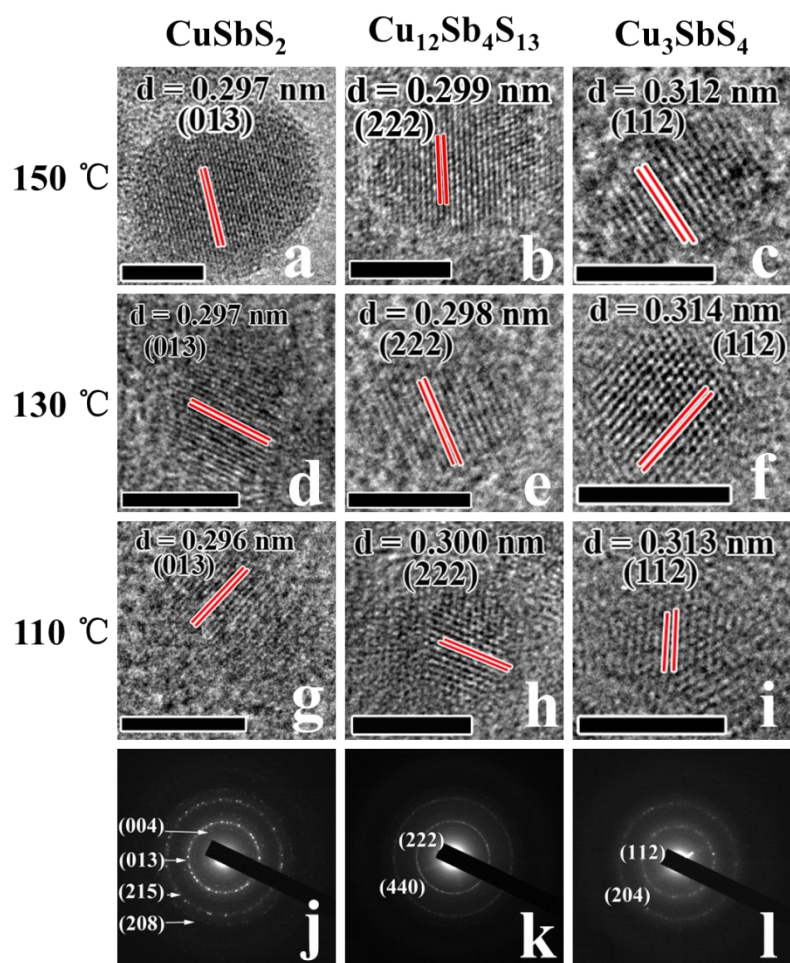

**Figure S2.** (a-i) HRTEM images of CAS NCs of different phases with tunable sizes prepared at various temperatures. The scale bars are 5 nm. (j-l) SAED patterns of CAS NCs of different phases.

| <b>Phases</b>                                      | <b>Size (nm)</b> | <b>Absorption band edge (nm)</b> | <b>Band gap (eV)</b> |
|----------------------------------------------------|------------------|----------------------------------|----------------------|
| <b>CuSbS<sub>2</sub></b>                           | <b>11.26</b>     | <b>970</b>                       | <b>1.48</b>          |
|                                                    | <b>6.12</b>      | <b>910</b>                       | <b>1.66</b>          |
|                                                    | <b>4.31</b>      | <b>830</b>                       | <b>1.76</b>          |
| <b>Cu<sub>12</sub>Sb<sub>4</sub>S<sub>13</sub></b> | <b>7.86</b>      | <b>710</b>                       | <b>1.94</b>          |
|                                                    | <b>5.76</b>      | <b>690</b>                       | <b>2.10</b>          |
|                                                    | <b>4.35</b>      | <b>650</b>                       | <b>2.28</b>          |
| <b>Cu<sub>3</sub>SbS<sub>4</sub></b>               | <b>5.95</b>      | <b>840</b>                       | <b>1.50</b>          |
|                                                    | <b>4.81</b>      | <b>810</b>                       | <b>1.58</b>          |
|                                                    | <b>3.37</b>      | <b>770</b>                       | <b>1.66</b>          |

**Table S3.** Absorption band edges and band gaps data of different phases with various sizes.
